# Supplementary material
Source: Royal Society of Chemistry journal article supplement (doi:10.1039/d6ma00478d)
Supplement: d6ma00478d1.pdf [file d6ma00478d1.pdf]

## Supporting Information

### Atomically engineered black phosphorene nanosheets for selective detection of ovarian cancer VOC biomarkers

Ramkumar D<sup>1</sup>, Jeeva vergin raj K A, Viveka N, C. Preferencial Kala<sup>1,\*</sup>, Hariharan R M,

Centre for Materials Sciences and Nanodevices, Department of Physics and Nanotechnology, SRM Institute of Science and Technology, Kattankulathur 603203, India.

(\* Corresponding author Email: [preferec@srmist.edu.in](mailto:preferec@srmist.edu.in))

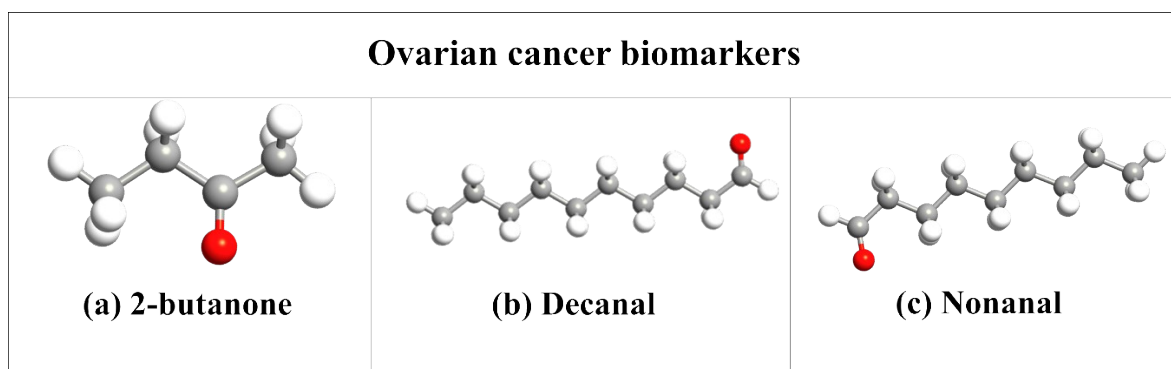

**Figure S1:** DFT-relaxed free molecular structures of three VOCs, related to ovarian cancer biomarkers: (a) 2-butanone (b) Decanal (c) Nonanal.

**Table S1.** Calculated adsorption energies ( $E_{\text{ads}}$ ) and equilibrium distances ( $d$ ) for OC VOCs adsorbed on black phosphorene.

| VOC molecule | Adsorption configuration | $E_{\text{ads}}$ (eV) | $d$ (Å) |
|--------------|--------------------------|-----------------------|---------|
| 2-butanone   | Vertical                 | -0.10                 | 3.10    |
|              | Horizontal               | -0.12                 | 3.16    |
| Decanal      | Vertical                 | -0.14                 | 3.00    |
|              | Horizontal               | -0.45                 | 3.04    |
| Nonanal      | Vertical                 | -0.08                 | 3.06    |
|              | Horizontal               | -0.13                 | 3.14    |

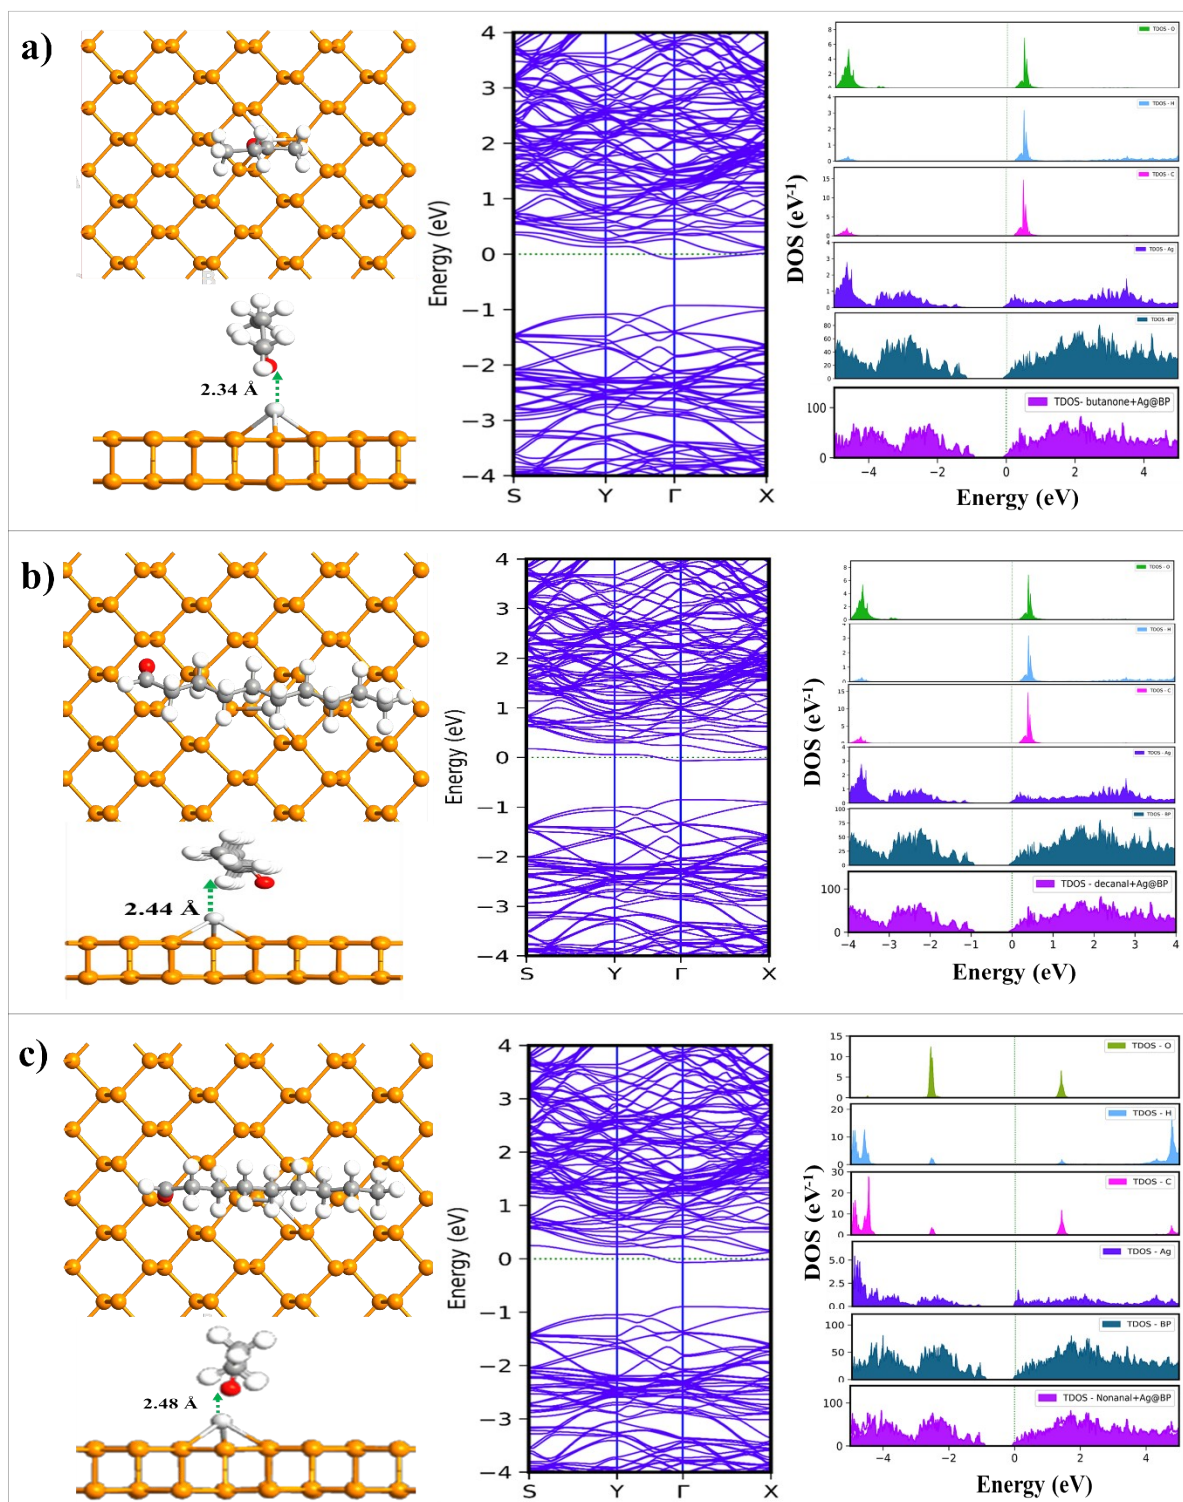

**Figure S2.** Relaxed structure of three VOCs related to OC biomarkers, on Ag decorated BP (Top and side views) and band structure and projected density of states (PDOS):

(a) 2-butanone, (b) decanal, (c) nonanal.

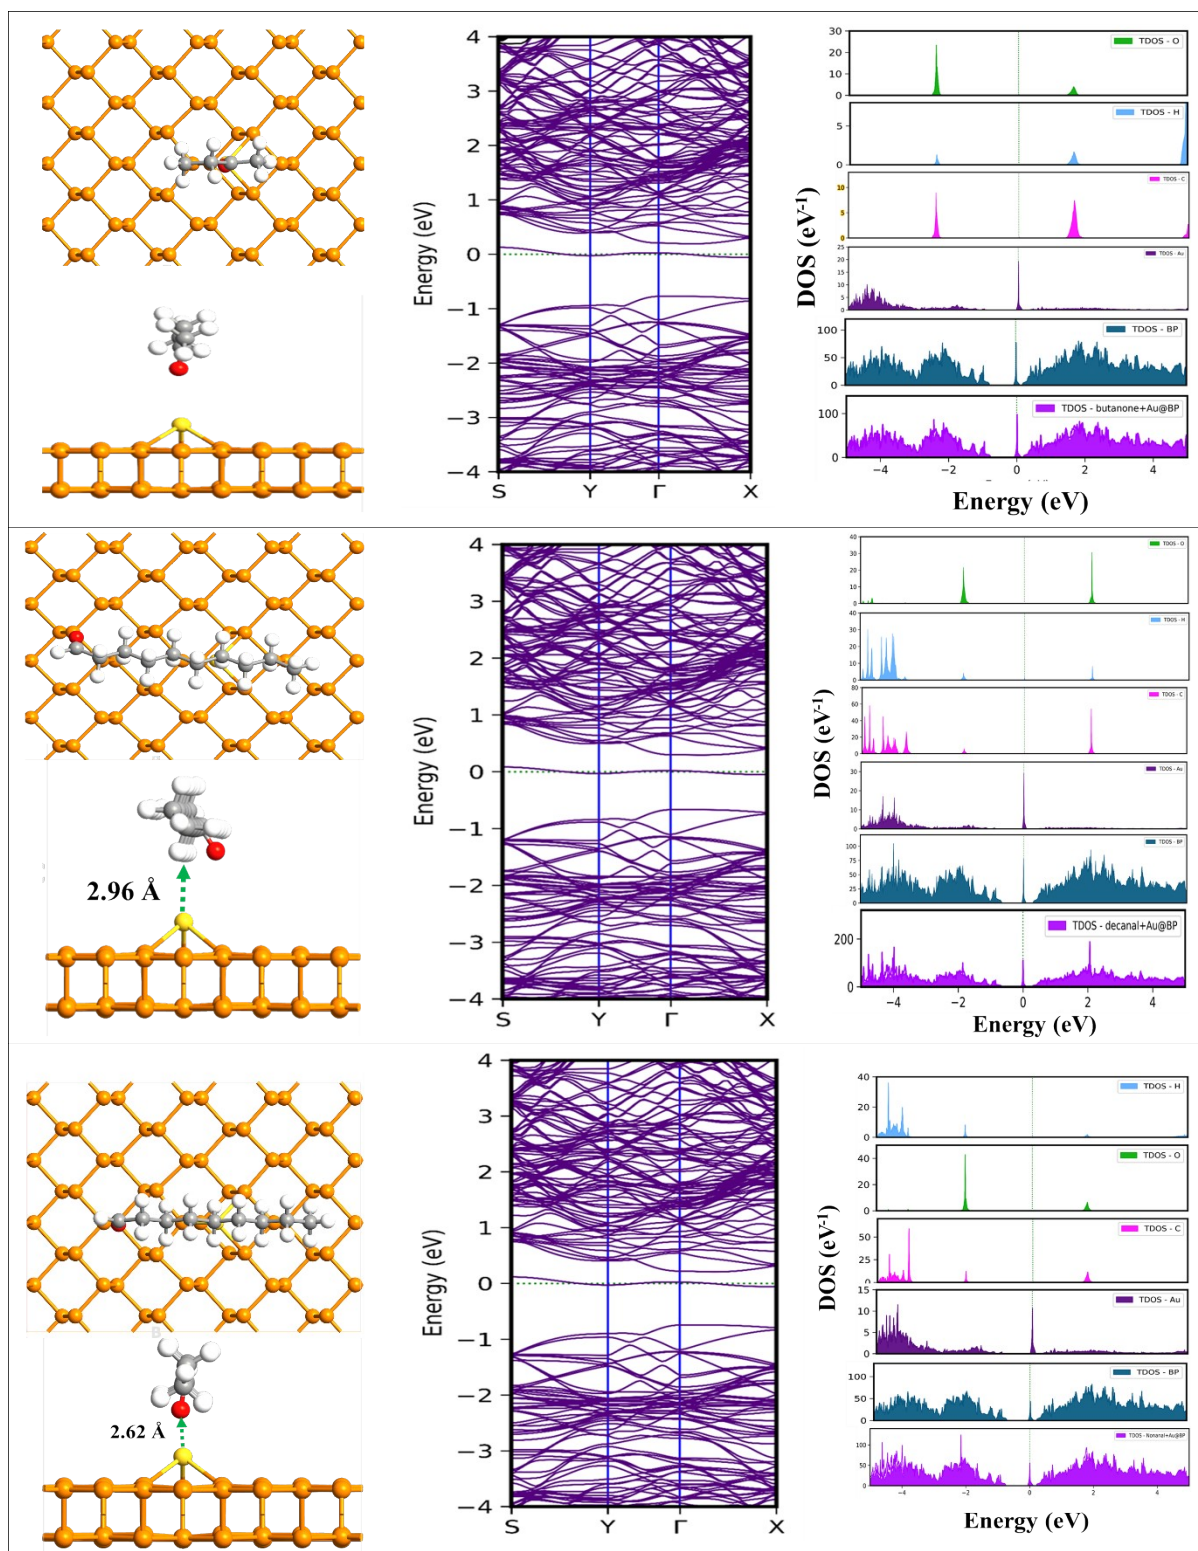

**Figure S3.** Relaxed structure of three VOCs related to OC biomarkers, on Au decorated BP (Top and side views) and band structure and projected density of states (PDOS):  
 (a) 2-butanone, (b) decanal, (c) nonanal.
